# Supplementary material for: Serum Levels of miR-143 Predict Survival in Critically Ill Patients
Source: Hindawi journal article supplement (doi:10.1155/2019/4850472), 2019-10-23

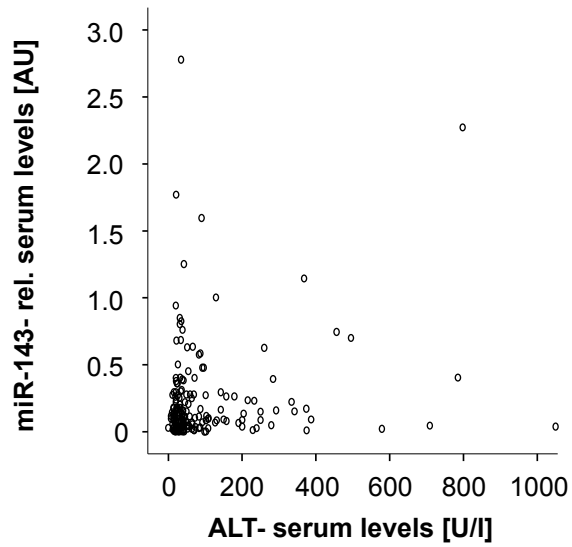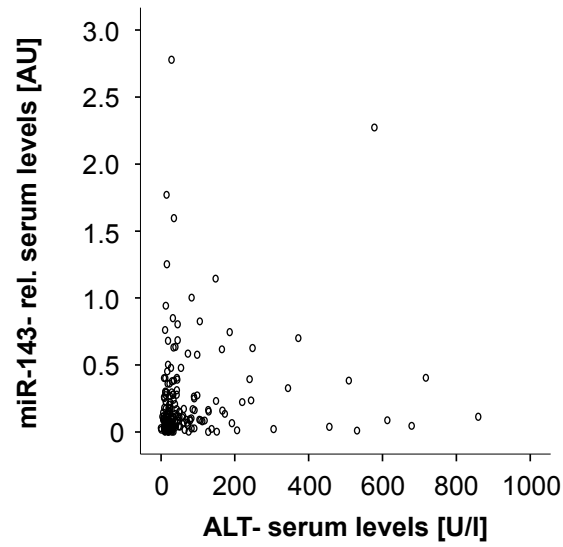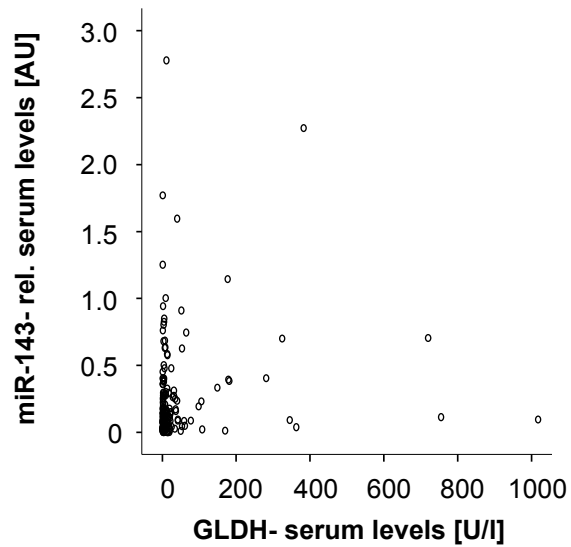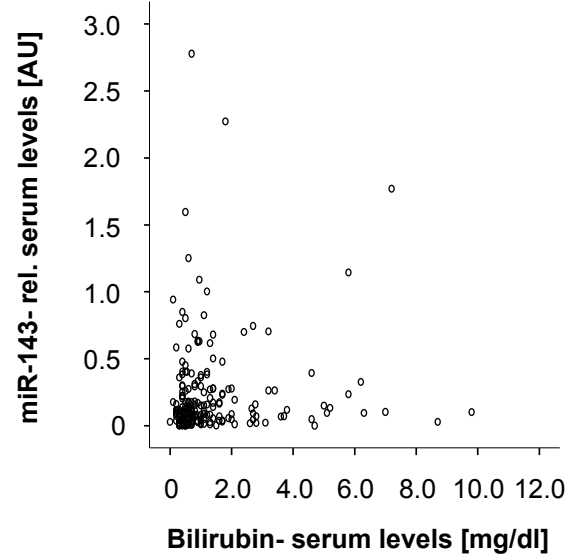

Supplement: f1 [file 4850472.f1.pdf]
